# Supplementary material for: Continuous synthesis of Cu/ZnO/Al2O3 nanoparticles in a co-precipitation reaction using a silicon based microfluidic reactor
Source: Royal Society of Chemistry journal article supplement (doi:10.1039/d1re00499a), 2021-12-17
Supplement: d1re00499a1.pdf [file d1re00499a1.pdf]

## Supporting Information

### Continuous Synthesis of Cu/ZnO/Al<sub>2</sub>O<sub>3</sub> Nanoparticles in a Co-precipitation Reaction Using a Silicon Based Microfluidic Reactor

*Ghazal Tofighi<sup>a</sup>, Henning Lichtenberg<sup>a,b</sup>, Abhijeet Gaur<sup>a,b</sup>, Wu Wang<sup>c</sup>, Stefan Wild<sup>b</sup>, Karla Herrera Delgado<sup>b</sup>, Stephan Pitter<sup>b</sup>, Roland Dittmeyer<sup>d</sup>, Jan-Dierk Grunwaldt<sup>a,b</sup> and, Dmitry E. Doronkin<sup>a,b,\*</sup>*

<sup>a</sup> Institute for Chemical Technology and Polymer Chemistry (ITCP), Karlsruhe Institute of Technology (KIT), D-76131 Karlsruhe, Germany

<sup>b</sup> Institute of Catalysis Research and Technology (IKFT), Karlsruhe Institute of Technology (KIT), D-76344 Eggenstein-Leopoldshafen, Germany

<sup>c</sup> Institute of Nanotechnology (INT), Karlsruhe Institute of Technology (KIT), D-76344 Eggenstein-Leopoldshafen, Germany

<sup>d</sup> Institute for Micro Process Engineering (IMVT), Karlsruhe Institute of Technology (KIT), D-76344 Eggenstein-Leopoldshafen, Germany

\* Corresponding author: [dmitry.doronkin@kit.edu](mailto:dmitry.doronkin@kit.edu)

Tel.: +49 608 48090

Fax: +49 608 44820

## 1. Additional information on the catalytic testing

**Table S1** Reaction conditions in a plug flow reactor (PFR) test

| ToS<br>h | Temperature<br>°C | CO/CO <sub>2</sub><br>mol% | Pressure<br>bar | GHSV<br>mL <sub>N</sub> g <sup>-1</sup> h <sup>-1</sup> <sub>cat</sub> |
|----------|-------------------|----------------------------|-----------------|------------------------------------------------------------------------|
| 2        | 230               | 15/0                       | 50              | 24000                                                                  |
| 4        | 230               | 14/1                       | 50              | 24000                                                                  |
| 6        | 250               | 15/0                       | 50              | 24000                                                                  |
| 8        | 250               | 14/1                       | 50              | 24000                                                                  |

### Catalytic performance

#### Selectivity:

The selectivity formula is defined according to whether CO<sub>2</sub> is a product or a reactant

For negative CO<sub>2</sub> conversion (CO<sub>2</sub> is a product):

$$S_{DME,CO} = \frac{2 * \dot{n}_{DME,out}}{2 * \dot{n}_{DME,out} + \dot{n}_{MeOH,out} + \sum n_{C_i} n_i + \dot{n}_{CO_2,out} - \dot{n}_{CO_2,in}} * 100\%$$

$$S_{MeOH,CO} = \frac{\dot{n}_{MeOH,out}}{2 * \dot{n}_{DME,out} + \dot{n}_{MeOH,out} + \sum n_{C_i} n_i + \dot{n}_{CO_2,out} - \dot{n}_{CO_2,in}} * 100\%$$

Where  $n_{C_i}$  represents the number of carbon atoms in the hydrocarbon  $n_i$ .

With positive CO<sub>2</sub> conversion (CO<sub>2</sub> is a reactant):

$$S_{DME,CO_x} = \frac{2 * \dot{n}_{DME,out}}{2 * \dot{n}_{DME,out} + \dot{n}_{MeOH,out} + \sum n_{C_i} n_i} * 100\%$$

$$S_{MeOH,CO_x} = \frac{\dot{n}_{MeOH,out}}{2 * \dot{n}_{DME,out} + \dot{n}_{MeOH,out} + \sum n_{C_i} n_i} * 100\%$$

#### Productivity:

The productivity of DME and MeOH is based on the number of carbon atoms in the respective hydrocarbon

$$P_{DME,m_{cat}} = \frac{2 \dot{n}_{DME,out}}{mass_{cat}} [mmol_C \cdot (g_{cat} * h)^{-1}]$$

$$P_{MeOH, m_{cat}} = \frac{\dot{n}_{MeOH, out}}{mass_{cat}} [mmol_C \cdot (g_{cat} * h)^{-1}] \quad (6)$$

## 2. Further Characterization results

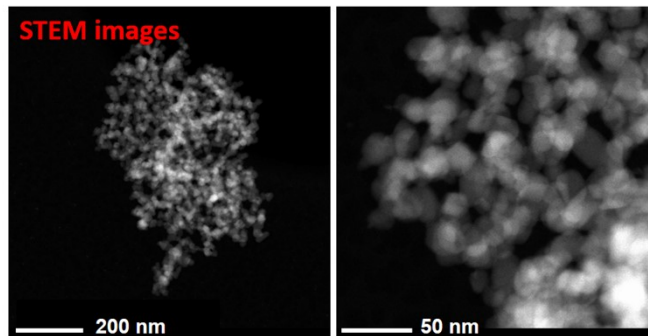

**Fig. S1** STEM images of calcined CuO/ZnO nanoparticles produced in the batch reactor.

**Table S2** Quantified EDX results from different regions of the CuO/ZnO catalyst produced in the batch reactor (Cu/Zn = 2.2 ± 1.2 and  $\sigma^2 = 1.4$ ).

| Particle No. | O (at.%) | Cu (at.%) | Zn (at.%) | Cu:Zn ratio |
|--------------|----------|-----------|-----------|-------------|
| 1            | 41.5     | 47.1      | 11.4      | 4.1         |
| 2            | 56.9     | 23.6      | 19.4      | 1.2         |
| 3            | 59.8     | 22.2      | 17.9      | 1.2         |
| 4            | 43.9     | 33.1      | 22.9      | 1.4         |
| 5            | 58.5     | 30.2      | 11.3      | 2.7         |
| 6            | 49.0     | 37.7      | 13.3      | 2.8         |

$\sigma^2$ : Variance

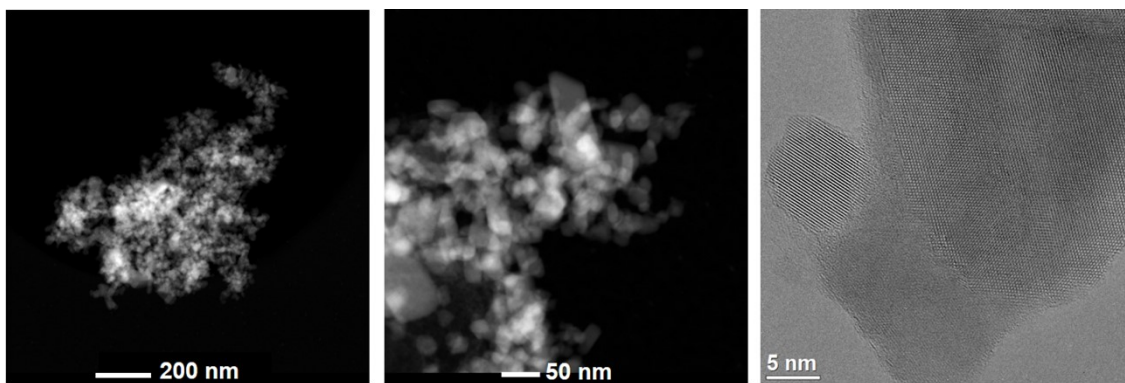

**Fig. S2** Selected electron microscopy images of calcined CuO/ZnO/Al<sub>2</sub>O<sub>3</sub> nanoparticles produced in the batch reactor.

**Table S3** Quantified EDX results from different regions of the CuO/ZnO/Al<sub>2</sub>O<sub>3</sub> catalyst produced in the batch reactor, (Cu/Zn = 20.1 ± 3.5 and  $\sigma^2 = 12.6$ ).

| No. | O (at.%) | Al (at.%) | Cu (at.%) | Zn (at.%) | Cu:Zn ratio |
|-----|----------|-----------|-----------|-----------|-------------|
| 1   | 61.4     | 1.4       | 34.9      | 2.2       | 15.9        |
| 2   | 58.3     | 1.0       | 39.2      | 1.6       | 24.5        |
| 3   | 54.3     | 0.6       | 43.2      | 1.8       | 24.0        |
| 4   | 53.1     | 0.8       | 43.9      | 2.2       | 20.0        |
| 5   | 57.9     | 1.4       | 39.6      | 2.0       | 19.8        |
| 6   | 58.6     | 2.2       | 36.9      | 2.2       | 16.8        |

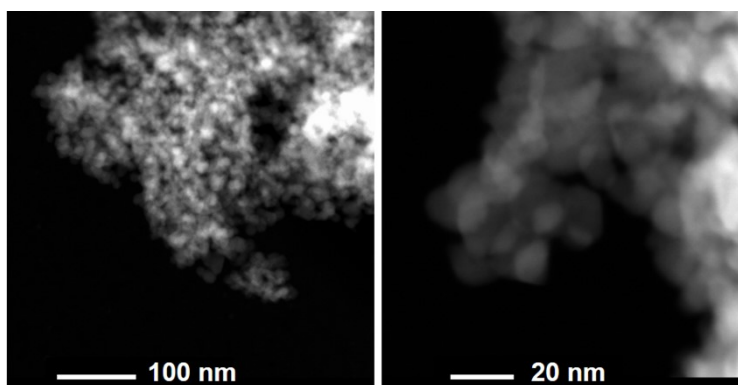

**Fig. S3** Selected electron microscopy images of calcined CuO/ZnO/Al<sub>2</sub>O<sub>3</sub> nanoparticles produced in the microfluidic reactor.

**Table S4** Quantified EDX results from different regions of the CuO/ZnO/Al<sub>2</sub>O<sub>3</sub> catalyst produced in the microfluidic reactor (Cu/Zn = 8.2 ± 2.1 and σ<sup>2</sup> = 4.6).

| No. | O (at.%) | Al (at.%) | Cu (at.%) | Zn (at.%) | Cu:Zn ratio |
|-----|----------|-----------|-----------|-----------|-------------|
| 1   | 67.2     | 1.7       | 28.0      | 3.1       | 9.0         |
| 2   | 57.8     | 2.4       | 36.7      | 3.2       | 11.5        |
| 3   | 62.1     | 9.4       | 23.9      | 4.6       | 5.2         |
| 4   | 52.3     | 5.9       | 36.5      | 5.4       | 6.8         |
| 5   | 59.3     | 1.1       | 35.2      | 4.4       | 8.0         |
| 6   | 59.3     | 3.2       | 33.6      | 3.8       | 8.8         |

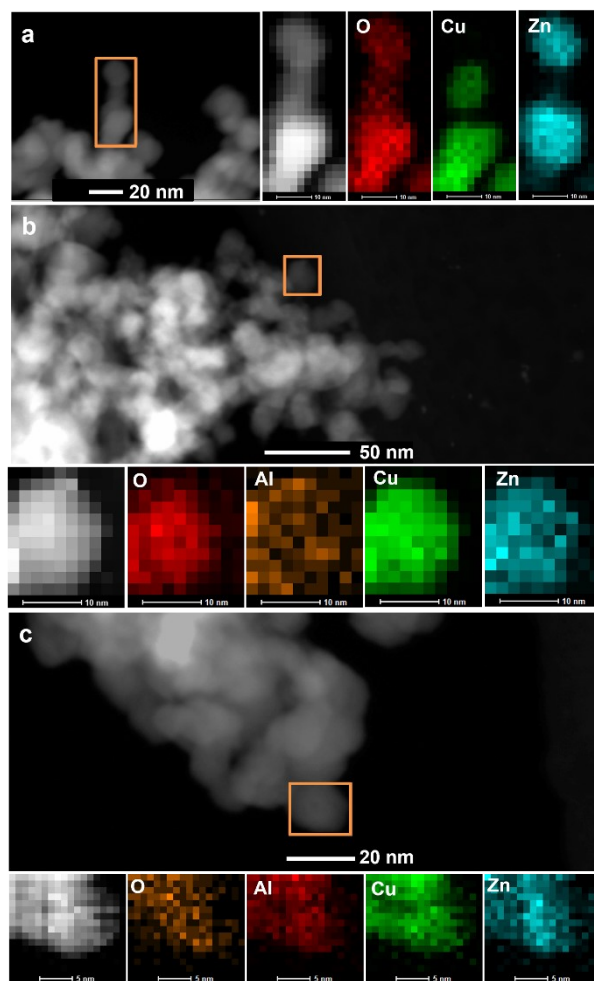

**Fig. S4** STEM images and the corresponding elemental maps obtained from STEM-EDX spectrum imaging in the areas marked by the orange box of calcined (a) Cu/ZnO, (b) Cu/ZnO/Al<sub>2</sub>O<sub>3</sub> nanoparticles produced in the batch reactor and (c) Cu/ZnO/Al<sub>2</sub>O<sub>3</sub> nanoparticles produced in the microfluidic reactor. Scale bars for the elemental maps are 10 nm (parts a,b) and 5 nm (part c).

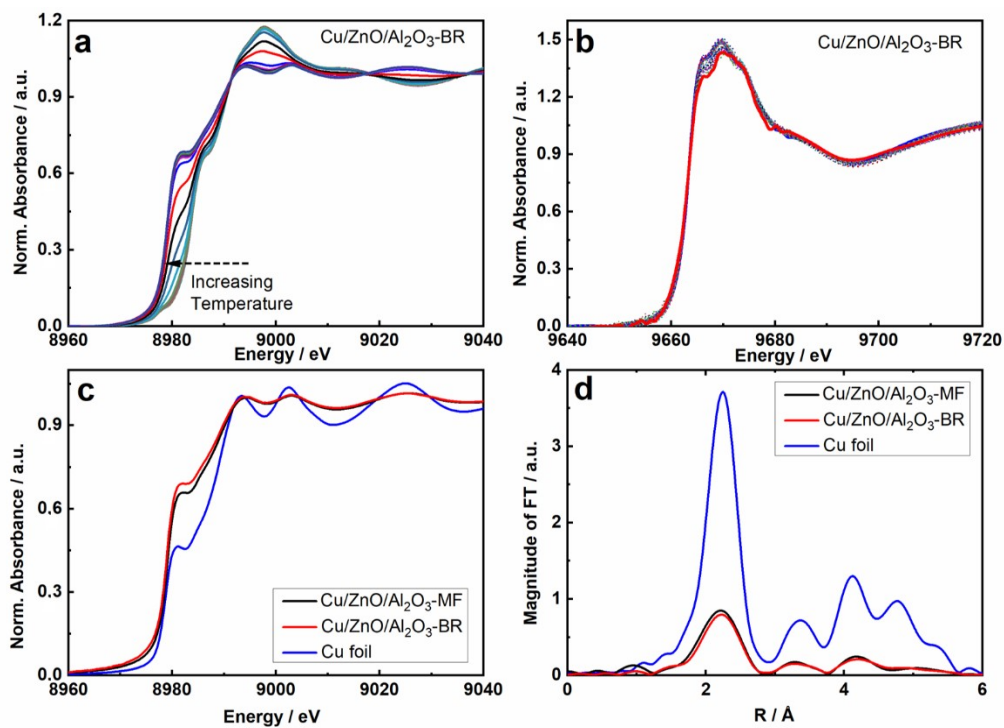

**Fig. S5** *In situ* XANES spectra at (a) Cu K and (b) Zn K-edges of Cu/ZnO/Al<sub>2</sub>O<sub>3</sub> produced in the batch reactor measured during the TPR (from 20 °C up to 260 °C), (c) comparison of XANES data of the reduced catalysts produced in microfluidic and batch reactor at 260 °C along with (d) their corresponding magnitude of the  $k^3$ -weighted Fourier transformed EXAFS data at Cu K-edge.
